# Supplementary material for: Species Delimitation in a Polyploid Group of Iberian Jasione (Campanulaceae) Unveils Coherence between Cryptic Speciation and Biogeographical Regionalization
Source: MDPI journal article supplement (doi:10.3390/plants12244176), 2023-12-15
Supplement: s1 [file s1]

## Supplementary Materials

Table S1: Genbank accessions of plastid markers with information on ploidy, locality, and herbarium voucher. \* Latitude and longitude precision in *Jasione crispa* var. *praelittoralis* is purposely obscured for conservation reasons.

| Taxon                                       | Ploidy level | Location and voucher                         | latitude    | longitude | psbA-trnH | ndhF     | trnL-trnF | trnT(UGU)-trnQ |
|---------------------------------------------|--------------|----------------------------------------------|-------------|-----------|-----------|----------|-----------|----------------|
| <i>J. crispa</i> var. <i>praelittoralis</i> | 2x           | Spain, Castellfollit<br>SANT62725            | 41.3*       | 1.0*      | OR873368  | OR873245 | OR873286  | OR873327       |
| <i>J. sessiliflora</i>                      | 4x           | Spain, Laspaules<br>SANT62894                | 42.472049   | 0.587369  | OR873369  | OR873246 | OR873287  | OR873328       |
| <i>J. sessiliflora</i>                      | 4x           | Portugal, Devesas<br>SANT70519               | 40.90534    | -7.21958  | OR873370  | OR873247 | OR873288  | OR873329       |
| <i>J. sessiliflora</i>                      | 4x           | Spain, Lobios<br>SANT64249                   | 41.833918   | -8.077569 | OR873371  | OR873248 | OR873289  | OR873330       |
| <i>J. sessiliflora</i>                      | 4x           | Spain, La Guiana<br>SANT64376                | 42.442065   | -6.602601 | OR873372  | OR873249 | OR873290  | OR873331       |
| <i>J. sessiliflora</i>                      | 4x           | Spain, Ventanilla<br>SANT60171               | 42.876833   | -4.56027  | OR873373  | OR873250 | OR873291  | OR873332       |
| <i>J. sessiliflora</i>                      | 4x           | Spain, Orihuela del<br>Tremedal<br>SANT64352 | 40.510161 3 | -1.65522  | OR873374  | OR873251 | OR873292  | OR873333       |
| <i>J. sessiliflora</i>                      | 4x           | Portugal, Formil<br>SANT62915                | 41.798864   | -6.842219 | OR873375  | OR873252 | OR873293  | OR873334       |
| <i>J. sessiliflora</i>                      | 4x           | Portugal, Fundação<br>SANT62467              | 40.11008    | -7.475982 | OR873376  | OR873253 | OR873294  | OR873335       |

|                                                       |    |                                               |           |           |          |          |          |          |
|-------------------------------------------------------|----|-----------------------------------------------|-----------|-----------|----------|----------|----------|----------|
| <i>J. sessiliflora</i>                                | 4x | Spain, Valdemanco<br>SANT62734                | 40.880619 | -3.885966 | OR873377 | OR873254 | OR873295 | OR873336 |
| <i>J. sessiliflora</i>                                | 4x | Spain, Vinuesa<br>SANT64298                   | 41.862114 | -2.733729 | OR873378 | OR873255 | OR873296 | OR873337 |
| <i>J. sessiliflora</i>                                | 4x | Spain, Candelario<br>SANT76418                | 40.336592 | -5.766513 | OR873379 | OR873256 | OR873297 | OR873338 |
| <i>J. crispata</i> subsp. <i>seguensis</i>            | 4x | Spain, Orcera<br>SANT62775                    | 38.324479 | -2.646675 | OR873380 | OR873257 | OR873298 | OR873339 |
| <i>J. crispata</i> subsp. <i>seguensis</i>            | 4x | Spain, Riopar<br>SANT83471                    | 38.470780 | -2.457637 | OR873381 | OR873258 | OR873299 | OR873340 |
| " <i>J. crispata</i> "                                | 4x | Spain, Gredos,<br>SANT62778                   | 40.269670 | -5.239406 | OR873382 | OR873259 | OR873300 | OR873341 |
| " <i>J. crispata</i> "                                | 4x | Portugal, Serra da<br>Estrela SANT62903       | 40.321060 | -7.609320 | OR873383 | OR873260 | OR873301 | OR873342 |
| <i>J. crispata</i> subsp. <i>tomentosa</i>            | 4x | Spain, Almagro<br>SANT60478                   | 38.856944 | -3.663611 | OR873384 | OR873261 | OR873302 | OR873343 |
| <i>J. crispata</i> subsp. <i>tomentosa</i>            | 4x | Spain, Aldea del<br>Rey SANT60479             | 38.737222 | -3.875833 | OR873385 | OR873262 | OR873303 | OR873344 |
| <i>J. sessiliflora</i> subsp.<br><i>appressifolia</i> | 2x | Spain, Torralba del<br>Pinar SANT62765        | 39.974612 | -0.429164 | OR873386 | OR873263 | OR873304 | OR873345 |
| <i>J. sessiliflora</i> subsp.<br><i>appressifolia</i> | 2x | Spain, Gàtova<br>SANT62766                    | 39.747875 | -0.503215 | OR873387 | OR873264 | OR873305 | OR873346 |
| <i>J. sessiliflora</i> subsp.<br><i>appressifolia</i> | 2x | Spain, Alcudia de<br>Veo SANT62765            | 39.901612 | -0.376275 | OR873388 | OR873265 | OR873306 | OR873347 |
| " <i>J. crispata</i> "                                | 2x | Spain, Candelario<br>SANT64366                | 40.333946 | -5.729182 | OR873389 | OR873266 | OR873307 | OR873348 |
| " <i>J. crispata</i> "                                | 2x | Spain, Casares de<br>las Hurdes SANT<br>70548 | 40.432053 | -6.339712 | OR873390 | OR873267 | OR873308 | OR873349 |
| <i>J. crispata</i> subsp. <i>tomentosa</i>            | 2x | Spain, Guadalupe<br>SANT62675                 | 39.470307 | -5.40169  | OR873391 | OR873268 | OR873309 | OR873350 |
| <i>J. crispata</i> subsp. <i>tomentosa</i>            | 2x | Spain, Hontanar<br>SANT79493                  | 39.585037 | -4.526249 | OR873392 | OR873269 | OR873310 | OR873351 |

|                                         |    |                                      |           |           |          |          |          |          |
|-----------------------------------------|----|--------------------------------------|-----------|-----------|----------|----------|----------|----------|
| <i>J.crispa</i> subsp. <i>tomentosa</i> | 2x | Spain, Puebla de Alcocer SANT62912   | 38.985098 | -5.279662 | OR873393 | OR873270 | OR873311 | OR873352 |
| <i>J.crispa</i> subsp. <i>tomentosa</i> | 2x | Spain, Almodóvar del Campo SANT62892 | 38.597173 | -4.78885  | OR873394 | OR873271 | OR873312 | OR873353 |
| <i>J.crispa</i> subsp. <i>tomentosa</i> | 2x | Spain, Poblete SANT77842             | 38.951100 | -3.969200 | OR873395 | OR873272 | OR873313 | OR873354 |
| <i>J.crispa</i> subsp. <i>tomentosa</i> | 2x | Spain, Despeñaperros SANT64365       | 38.383046 | -3.501806 | OR873396 | OR873273 | OR873314 | OR873355 |
| <i>J.crispa</i> subsp. <i>mariana</i>   | 2x | Spain, Despeñaperros                 | 38.383046 | -3.501806 | OR873397 | OR873274 | OR873315 | OR873356 |
| <i>J.crispa</i> subsp. <i>mariana</i>   | 2x | Spain, Santa Eufemia SANT72393       | 38.606894 | -4.910859 | OR873398 | OR873275 | OR873316 | OR873357 |
| <i>J.crispa</i> subsp. <i>mariana</i>   | 2x | Spain, Santa Eufemia SANT72394       | 38.606997 | -4.910673 | OR873399 | OR873276 | OR873317 | OR873358 |
| <i>J.crispa</i> subsp. <i>mariana</i>   | 2x | Spain, Villapalacios SANT79461       | 38.592707 | -2.691179 | OR873400 | OR873277 | OR873318 | OR873359 |
| <i>J.crispa</i> subsp. <i>tomentosa</i> | 2x | Spain, Alhambra SANT62741            | 38.874781 | -3.082159 | OR873401 | OR873278 | OR873319 | OR873360 |
| <i>J.crispa</i> subsp. <i>tomentosa</i> | 2x | Spain, Mora SANT64279                | 39.680148 | -3.73019  | OR873402 | OR873279 | OR873320 | OR873361 |
| <i>J.crispa</i> subsp. <i>tomentosa</i> | 6x | Spain, Piedrabuena SANT62905         | 39.123514 | -4.131192 | OR873403 | OR873280 | OR873321 | OR873362 |
| <i>J.crispa</i> subsp. <i>crispa</i>    | 6x | Spain, Boí-Taüll SANT69663 ex1       | 42.479290 | 0.866214  | OR873404 | OR873281 | OR873322 | OR873363 |
| <i>J.crispa</i> subsp. <i>crispa</i>    | 6x | Spain, Queralbs SANT60186            | 42.367510 | 2.152655  | OR873405 | OR873282 | OR873323 | OR873364 |
| <i>J.crispa</i> subsp. <i>crispa</i>    | 6x | Andorra, Envalira SANT64353          | 42.538347 | 1.716657  | OR873406 | OR873283 | OR873324 | OR873365 |
| <i>J.crispa</i> subsp. <i>crispa</i>    | 6x | Spain, Boí-Taüll 2 SANT69663 ex2     | 42.479290 | 0.866214  | OR873407 | OR873284 | OR873325 | OR873366 |
| <i>J.crispa</i> subsp. <i>crispa</i>    | 6x | France, Pic d'Eina SANT83470         | 42.421563 | 2.153153  | OR873408 | OR873285 | OR873326 | OR873367 |
